# Supplementary material for: Temperature-triggered capture of dispersed particles using deposited Laponite with grafted poly(N-isopropylacrylamide) chains
Source: Royal Society of Chemistry journal article supplement (doi:10.1039/b504252f), 2005-01-01

## Temperature-triggered capture of dispersed particles using deposited Laponite with grafted poly(N-isopropylacrylamide) chains

Jennifer M. Saunders and Brian R. Saunders\*

*School of Materials, The University of Manchester, Grosvenor Street, Manchester, M1 7HS.*

*Fax: 44(0)161 200 3586; Tel: 44(0)161 200 5944; E-mail: brian.saunders@manchester.ac.uk*

### Zeta potential data for dispersed Laponite particles with adsorbed ATRP initiator

The figure shown below gives the variation of the zeta potential of 0.5 wt.% dispersed Laponite as a function of time. The data point A corresponds to particles dispersed in water. Point B was taken after 0.20 wt.% of the ATRP initiator (I) was added and allowed to equilibrate for 22 h. The washing procedure used prior to ATRP was then simulated by centrifuging the dispersion twice and redispersing in water, giving data points C1 and C2. After the third centrifugation cycle, the particles were redispersed in  $10^{-3}$  M  $\text{NaNO}_3$  (data point D1) and then stirred for a further 16 h (data point D2). This last set of conditions is equivalent to the duration of ATRP and the ionic strength present for the electrode that contained electrodeposited Laponite.

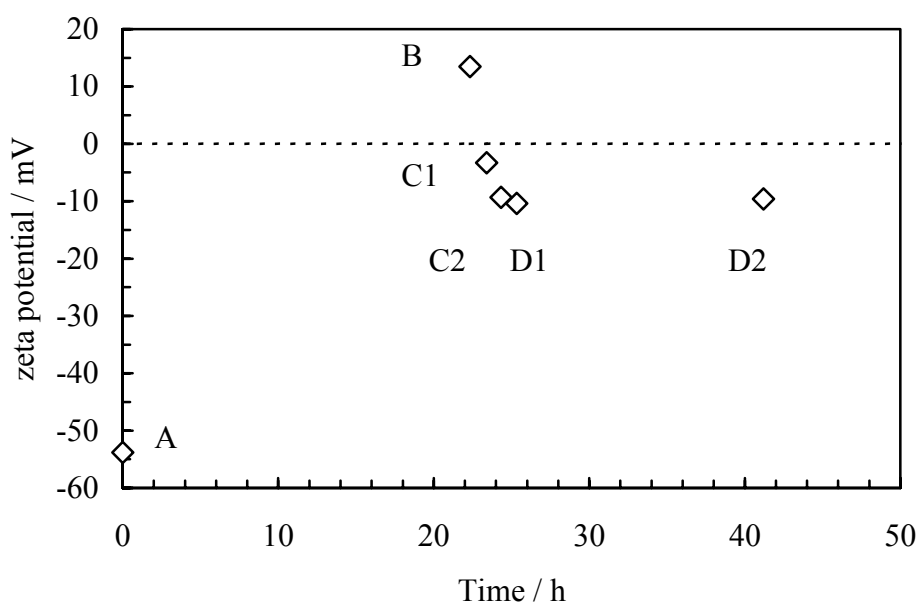

Supplement: b504252f.pdf [file b504252f.pdf]
